# Supplementary material for: Prepregnancy Dietary Protein Intake, Major Dietary Protein Sources, and the Risk of Gestational Diabetes Mellitus
Source: Oxford University Press journal article supplement (doi:10.2337/dc12-2018), 2013-02-02

SUPPLEMENTARY DATA

**Supplementary Figure 1.** Multivariate RR and 95% CI of GDM associated with substitution of some healthy protein sources.

Adjusted for age (5-year category), parity (0, 1, 2, 3+), race/ethnicity, family history of diabetes (yes, no), cigarette smoking (never, past, current), alcohol intake (0, 0.1-5.0, 5.1-10.0 or >10 g/day), physical activity (quintile), total energy intake (quintile), fruits intake (quintile), sugar-sweetened beverages intake (quintile), BMI (nine categories: <21, 21-22.9, 23.0-24.9, 25.0-26.9, 27.0-28.9, 29.0-30.9, 31.0-32.9, 33.0-34.9 and  $\geq 35.0$  kg/m<sup>2</sup>), and mutual adjustment for other major dietary protein sources.

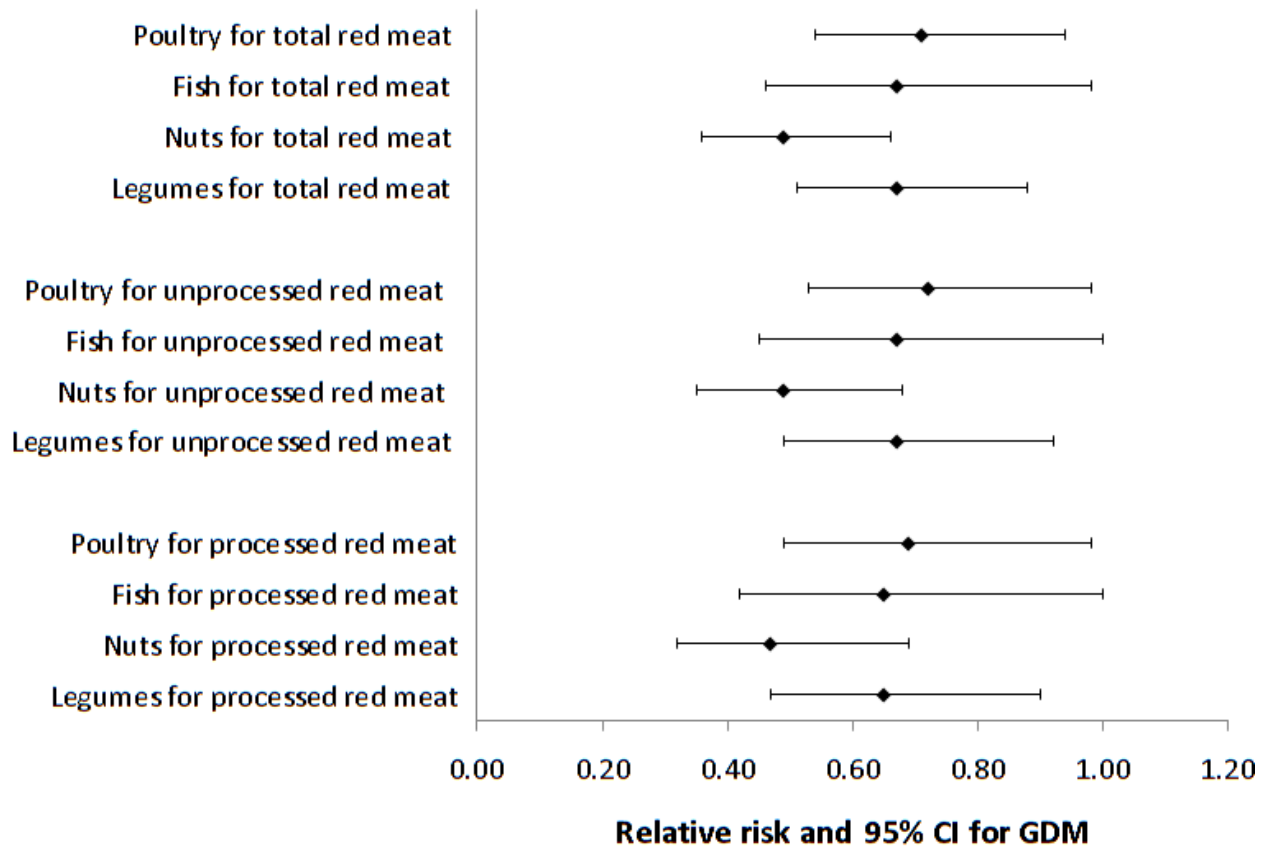

Supplement: dc122018supplementarydata.pdf [file dc122018supplementarydata.pdf]
